# Supplementary material for: Three Microbial Musketeers of the Seas: Shewanella baltica, Aliivibrio fischeri and Vibrio harveyi, and Their Adaptation to Different Salinity Probed by a Proteomic Approach
Source: MDPI journal article supplement (doi:10.3390/ijms23020619), 2022-01-06
Supplement: s1 [file s1]

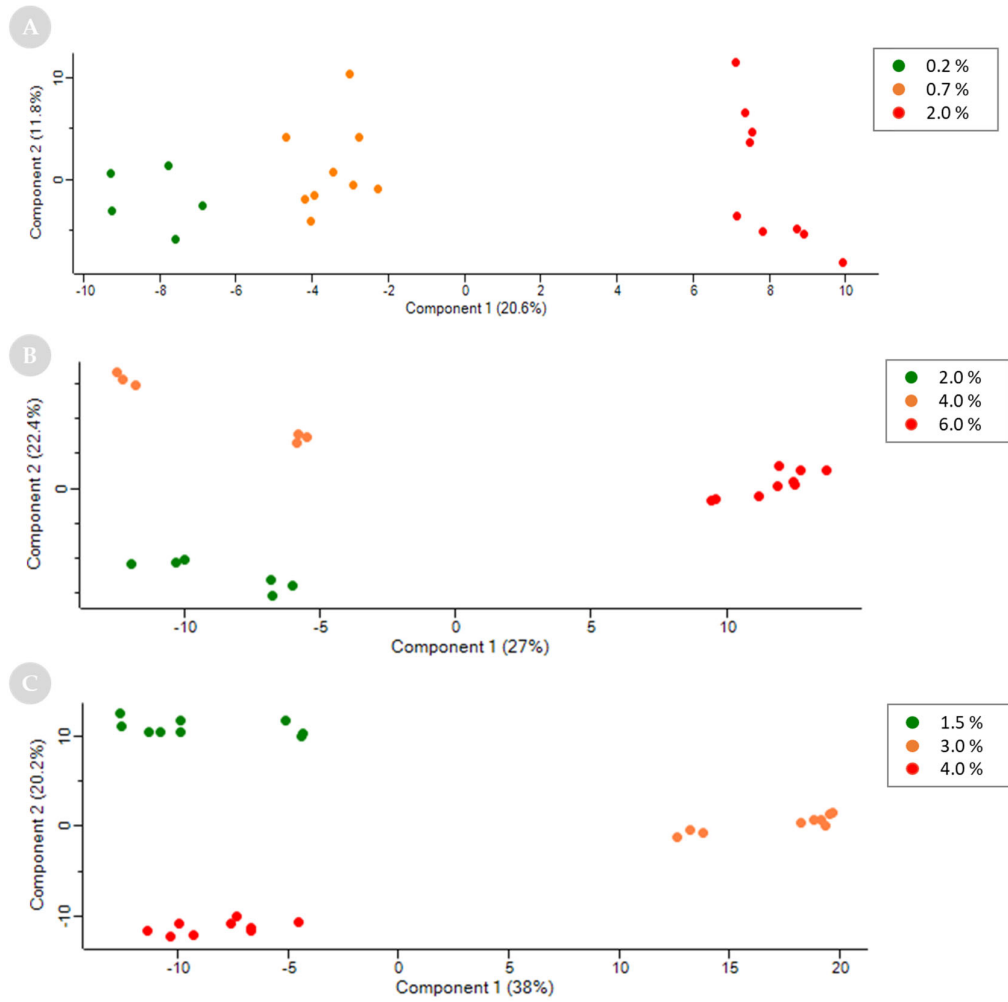

**Supplementary Figure S1.** Principal component analysis (PCA) of proteomic data. Biological and technical replicates obtained for (A) *S. baltica*, (B) *A. fischeri* and (C) *V. harveyi* grown at low (green dots), optimal (orange dots) and high (red dots) salinity are presented.
